# Supplementary material for: The associations between sports team participation and adolescent health risk behaviors in the United States
Source: Research Square preprint supplement (doi:10.21203/rs.3.rs-8586391/v1), 2026-02-12
Supplement: Supplementary file 1 [file 9788d1b4b20427c6a2f7b0a2.docx]

**Additional file 1**

**Table of Contents**

[Table S1. Survey questions and original response options from the YRBSS 2](#_Toc560373019)

[Table S2. Data availability and starting survey years for risk behavior domains 5](#_Toc1473538238)

[Table S3. Demographic characteristics of the study population by driving safety, tobacco and alcohol use, and sexual health behaviors (1999–2023) 6](#_Toc975748862)

[Table S4. Demographic characteristics of the study population by illicit drug use behaviors (1999–2023) 9](#_Toc1225995142)

[Table S5. Operational definitions and categorization of binary outcome variables 12](#_Toc194758629)

[Table S6. Adjusted predicted probabilities of risk behaviors by sports team participation frequency 17](#_Toc543199575)

**Table S1. Survey questions and original response options from the YRBSS**

|  |  |  | Items | | | | | | | |
| --- | --- | --- | --- | --- | --- | --- | --- | --- | --- | --- |
| NO. | Risk behaviour domain | Question | A | B | C | D | E | F | G | H |
| 1 | Driving behavior | During the past 30 days, how many times did you drive a car or other vehicle when you had been drinking alcohol ? | I did not drive a car or other vehicle during the past 30 days | 0 times | 1 time | 2 or 3 times | 4 or 5 times | 6 or more times | / | / |
| During the past 30 days, on how many days did you text or e-mail while driving a car or other vehicle? | I did not drive a car or other vehicle during the past 30 days | 0 days | 1 or 2 days | 3 to 5 days | 6 to 9 days | 10 to 19 days | 20 to 29 days | All 30 days |
| 2 | Smoking and alcohol behaviour | During the past 30 days, on how many days did you smoke cigarettes? | 0 days | 1 or 2 days | 3 to 5 days | 6 to 9 days | 10 to 19 days | 20 to 29 days | All 30 days | / |
| During the past 30 days, on how many days did you use an electronic vapor product? | 0 days | 1 or 2 days | 3 to 5 days | 6 to 9 days | 10 to 19 days | 20 to 29 days | All 30 days | / |
| During the past 30 days, on how many days did you have at least one drink of alcohol? | 0 days | 1 or 2 days | 3 to 5 days | 6 to 9 days | 10 to 19 days | 20 to 29 days | All 30 days | / |
| 3 | Drug use behaviors | During your life, how many times have you used marijuana? | 0 times | 1 or 2 times | 3 to 9 times | 10 to 19 times | 20 to 39 times | 40 to 99 times | 100 or more times | / |
| During your life, how many times have you used any form of cocaine, including powder, crack, or freebase? | 0 times | 1 or 2 times | 3 to 9 times | 10 to 19 times | 20 to 39 times | 40 or more times | / | / |
| During your life, how many times have you sniffed glue, breathed the contents of aerosol spray cans, or inhaled any paints or sprays to get high? | 0 times | 1 or 2 times | 3 to 9 times | 10 to 19 times | 20 to 39 times | 40 or more times | / | / |
| During your life, how many times have you used heroin (also called smack, junk, or China White)? | 0 times | 1 or 2 times | 3 to 9 times | 10 to 19 times | 20 to 39 times | 40 or more times | / | / |
| During your life, how many times have you used methamphetamines (also called speed, crystal meth, crank, ice, or meth)? | 0 times | 1 or 2 times | 3 to 9 times | 10 to 19 times | 20 to 39 times | 40 or more times | / | / |
| During your life, how many times have you used ecstasy (also called MDMA or Molly)? | 0 times | 1 or 2 times | 3 to 9 times | 10 to 19 times | 20 to 39 times | 40 or more times | / | / |
| During your life, how many times have you used a needle to inject any illegal drug into your body? | 0 times | 1 time | 2 or more times | / | / | / | / | / |
| 4 | Sexual behavior | During the past 3 months, with how many people did you have sexual intercourse? | I have never had sexual intercourse | I have had sexual intercourse, but not during the past 3 months | 1 person | 2 people | 3 people | 4 people | 5 people | 6 or more people |
| The last time you had sexual intercourse, did you or your partner use a condom? | I have never had sexual intercourse | Yes | No | / | / | / | / | / |

**Note: Items are derived from the standard Youth Risk Behavior Survey (YRBS) questionnaire. "Risk behaviour domain" indicates the category of behavior assessed. Abbreviations: YRBSS, Youth Risk Behavior Surveillance System.**

**Table S2. Data availability and starting survey years for risk behavior domains**

| Number | Behavior | Question | Starting year |
| --- | --- | --- | --- |
| 1 | Sports team participation | Number of sports teams played, past 12 months | 1999 |
| 2 | Current cigarette use | Number of cigarette-use days, past 30 days | 1991 |
| 3 | Current alcohol use | Number of alcohol-use days, past 30 days | 1991 |
| 4 | Current sexual activity | Number of sexual partners, past 3 months | 1991 |
| 5 | Condom use | Condom use at last sexual intercourse | 1991 |
| 6 | Ever marijuana use | Number of marijuana uses in lifetime | 1991 |
| 7 | Ever cocaine use | Number of cocaine uses in lifetime | 1991 |
| 8 | Ever inhalant use | Number of inhalant uses in lifetime | 1995 |
| 9 | Illegal injected drug use | Number of illegal injection episodes in lifetime | 1995 |
| 10 | Ever heroin use | Number of heroin uses in lifetime | 1999 |
| 11 | Ever methamphetamine use | Number of methamphetamine uses in lifetime | 1999 |
| 12 | Ever ecstasy use | Number of ecstasy uses in lifetime | 2001 |
| 13 | Drinking and driving | Number of drinking-driving days, past 30 days | 2013 |
| 14 | Texting and driving | Number of texting-driving days, past 30 days | 2013 |
| 15 | Current electronic vapor use | Number of e-vapor-use days, past 30 days | 2015 |

**Note: "Starting year" indicates the first survey cycle in which the specific question was consistently included in the YRBSS core questionnaire and available for the present analysis.**

**Table S3. Demographic characteristics of the study population by driving safety, tobacco and alcohol use, and sexual health behaviors (1999–2023)**

| **Variable** | **Level** | **Driving behavior** | **Smoking and alcohol behaviour** | **Electronic vapor use** | **Current sexual activity+Condom use** |
| --- | --- | --- | --- | --- | --- |
| Sex | Female | 28686 (49.9%) | 71869 (51.0%) | 23964 (49.7%) | 73781 (51.2%) |
| Male | 28804 (50.1%) | 69064 (49.0%) | 24232 (50.3%) | 70454 (48.8%) |
| Age | 12 years old or younger | 17 (0.0%) | 36 (0.0%) | 17 (0.0%) | 32 (0.0%) |
| 13 years old | 62 (0.1%) | 130 (0.1%) | 56 (0.1%) | 131 (0.1%) |
| 14 years old | 6414 (11.2%) | 14365 (10.2%) | 5750 (11.9%) | 14654 (10.2%) |
| 15 years old | 13785 (24.0%) | 32495 (23.1%) | 11898 (24.7%) | 33354 (23.1%) |
| 16 years old | 14670 (25.5%) | 36129 (25.6%) | 12418 (25.8%) | 36992 (25.6%) |
| 17 years old | 14695 (25.6%) | 36722 (26.1%) | 12031 (25.0%) | 37463 (26.0%) |
| 18 years old or older | 7847 (13.6%) | 21056 (14.9%) | 6026 (12.5%) | 21609 (15.0%) |
| Year | 1999 | / | 13498 (9.6%) | / | 13598 (9.4%) |
| 2001 | / | 11162 (7.9%) | / | 11538 (8.0%) |
| 2003 | / | 12237 (8.7%) | / | 11885 (8.2%) |
| 2005 | / | 11446 (8.1%) | / | 10923 (7.6%) |
| 2007 | / | 11091 (7.9%) | / | 11705 (8.1%) |
| 2009 | / | 12788 (9.1%) | / | 13194 (9.1%) |
| 2011 | / | 12046 (8.5%) | / | 12687 (8.8%) |
| 2013 | 11144 (19.4%) | 10716 (7.6%) | / | 11458 (7.9%) |
| 2015 | 11124 (19.3%) | 10630 (7.5%) | 11852 (24.6%) | 10847 (7.5%) |
| 2017 | 9715 (16.9%) | 8935 (6.3%) | 8983 (18.6%) | 9517 (6.6%) |
| 2019 | 7945 (13.8%) | 7050 (5.0%) | 8114 (16.8%) | 7664 (5.3%) |
| 2021 | 7434 (12.9%) | 8154 (5.8%) | 8142 (16.9%) | 8054 (5.6%) |
| 2023 | 10128 (17.6%) | 11180 (7.9%) | 11105 (23.0%) | 11165 (7.7%) |
| BMI Percentile | Mean ± SD | 63.8 ± 29.0 | 62.7 ± 28.6 | 63.8 ± 29.1 | 62.9 ± 28.5 |
| Race4 | White | 26536 (46.2%) | 64147 (45.5%) | 22513 (46.7%) | 64846 (45.0%) |
| Black or African American | 8160 (14.2%) | 25164 (17.9%) | 6054 (12.6%) | 25329 (17.6%) |
| Hispanic/Latino | 15014 (26.1%) | 36451 (25.9%) | 12545 (26.0%) | 38553 (26.7%) |
| All Other Races | 7780 (13.5%) | 15171 (10.8%) | 7084 (14.7%) | 15507 (10.8%) |
| Q78 | 0 teams | 26218 (45.6%) | 63906 (45.3%) | 22040 (45.7%) | 65300 (45.3%) |
| 1 team | 14977 (26.1%) | 35876 (25.5%) | 12397 (25.7%) | 36812 (25.5%) |
| 2 teams | 9549 (16.6%) | 23224 (16.5%) | 7959 (16.5%) | 23782 (16.5%) |
| 3 or more teams | 6746 (11.7%) | 17927 (12.7%) | 5800 (12.0%) | 18341 (12.7%) |
| Q10 | Mean ± SD | 1.7 ± 0.7 | / | / | / |
| Q11 | Mean ± SD | 2.4 ± 1.9 | / | / | / |
| Q33 | Mean ± SD | / | 1.5 ± 1.5 | / | / |
| Q42 | Mean ± SD | / | 1.7 ± 1.2 | / | / |
| Q36 | Mean ± SD |  | / | 1.7 ± 1.6 |  |
| Q59 | Mean ± SD |  | / |  | 2.0 ± 1.3 |
| Q61 | Mean ± SD |  | / |  | 1.6 ± 0.8 |
| Drinking and driving | No driving or 0 times | 55295 (96.2%) | / | / | / |
| Alcohol-impaired driving | 2195 (3.8%) | / | / | / |
| Texting while driving | No driving or 0 times | 43784 (76.2%) | / | / | / |
| Texting while driving | 13706 (23.8%) | / | / | / |
| Current cigarette use | Never | / | 118013 (83.7%) | / | / |
| Ever | / | 22920 (16.3%) | / | / |
| Current alcohol use | Never | / | 87656 (62.2%) | / | / |
| Ever | / | 53277 (37.8%) | / | / |
| Current electronic vapor use | Never used | / | / | 37765 (78.4%) | / |
| Ever used | / | / | 10431 (21.6%) | / |
| Current sexual activity | No partnered sex | / | / | / | 95009 (65.9%) |
| Had sex | / | / | / | 49226 (34.1%) |
| Condom use at last sexual intercourse | No condom use | / | / | / | 102610 (71.1%) |
| Used condom | / | / | / | 41625 (28.9%) |

**Note: Data are presented as unweighted frequencies (n) and weighted percentages (%). Abbreviations: SD, Standard Deviation; BMI, Body Mass Index.**

**Table S4. Demographic characteristics of the study population by illicit drug use behaviors (1999–2023)**

| **Variable** | **Level** | **Marijuana use** | **Cocaine use** | **Inhalant use+Illegal injected drug use** | **Heroin use+Methamphetamine use** | **Ecstasy use** |
| --- | --- | --- | --- | --- | --- | --- |
| Sex | Female | 77210 (50.7%) | 76765 (50.8%) | 76410 (50.6%) | 77830 (50.6%) | 69454 (50.4%) |
| Male | 74983 (49.3%) | 74377 (49.2%) | 74542 (49.4%) | 76003 (49.4%) | 68365 (49.6%) |
| Age | 12 years old or younger | 54 (0.0%) | 52 (0.0%) | 59 (0.0%) | 67 (0.0%) | 63 (0.0%) |
| 13 years old | 138 (0.1%) | 137 (0.1%) | 134 (0.1%) | 151 (0.1%) | 136 (0.1%) |
| 14 years old | 15237 (10.0%) | 15086 (10.0%) | 15005 (9.9%) | 15492 (10.1%) | 14114 (10.2%) |
| 15 years old | 35151 (23.1%) | 34869 (23.1%) | 34794 (23.0%) | 35596 (23.1%) | 32070 (23.3%) |
| 16 years old | 39008 (25.6%) | 38750 (25.6%) | 38711 (25.6%) | 39430 (25.6%) | 35298 (25.6%) |
| 17 years old | 39574 (26.0%) | 39341 (26.0%) | 39259 (26.0%) | 39853 (25.9%) | 35619 (25.8%) |
| 18 years old or older | 23031 (15.1%) | 22907 (15.2%) | 22990 (15.2%) | 23244 (15.1%) | 20519 (14.9%) |
| Year | 1999 | 14259 (9.4%) | 14219 (9.4%) | 14326 (9.5%) | 14431 (9.4%) | / |
| 2001 | 12018 (7.9%) | 11988 (7.9%) | 11764 (7.8%) | 12160 (7.9%) | 10628 (7.7%) |
| 2003 | 13208 (8.7%) | 13165 (8.7%) | 13315 (8.8%) | 13366 (8.7%) | 13195 (9.6%) |
| 2005 | 12211 (8.0%) | 12181 (8.1%) | 12170 (8.1%) | 12212 (7.9%) | 12370 (9.0%) |
| 2007 | 12291 (8.1%) | 12246 (8.1%) | 12406 (8.2%) | 12433 (8.1%) | 12412 (9.0%) |
| 2009 | 14179 (9.3%) | 14118 (9.3%) | 14337 (9.5%) | 14350 (9.3%) | 14363 (10.4%) |
| 2011 | 13278 (8.7%) | 13217 (8.7%) | 12550 (8.3%) | 12585 (8.2%) | 12768 (9.3%) |
| 2013 | 11839 (7.8%) | 11830 (7.8%) | 11904 (7.9%) | 11846 (7.7%) | 11919 (8.6%) |
| 2015 | 11698 (7.7%) | 11683 (7.7%) | 11584 (7.7%) | 11884 (7.7%) | 11846 (8.6%) |
| 2017 | 10205 (6.7%) | 10189 (6.7%) | 10183 (6.7%) | 10194 (6.6%) | 10203 (7.4%) |
| 2019 | 7518 (4.9%) | 7511 (5.0%) | 7435 (4.9%) | 8403 (5.5%) | 8442 (6.1%) |
| 2021 | 8376 (5.5%) | 8030 (5.3%) | 8096 (5.4%) | 8758 (5.7%) | 8414 (6.1%) |
| 2023 | 11113 (7.3%) | 10765 (7.1%) | 10882 (7.2%) | 11211 (7.3%) | 11259 (8.2%) |
| BMI Percentile | Mean ± SD | 63.0 ± 28.5 | 62.9 ± 28.5 | 63.0 ± 28.5 | 63.0 ± 28.5 | 63.3 ± 28.5 |
| Race4 | White | 68044 (44.7%) | 67727 (44.8%) | 67594 (44.8%) | 68349 (44.4%) | 62655 (45.5%) |
| Black or African American | 27907 (18.3%) | 27681 (18.3%) | 27636 (18.3%) | 28417 (18.5%) | 24045 (17.4%) |
| Hispanic/Latino | 40432 (26.6%) | 40143 (26.6%) | 40222 (26.6%) | 40884 (26.6%) | 36352 (26.4%) |
| All Other Races | 15810 (10.4%) | 15591 (10.3%) | 15500 (10.3%) | 16183 (10.5%) | 14767 (10.7%) |
| Q78 | 0 teams | 68861 (45.2%) | 68344 (45.2%) | 68039 (45.1%) | 69551 (45.2%) | 62165 (45.1%) |
| 1 team | 38854 (25.5%) | 38605 (25.5%) | 38596 (25.6%) | 39260 (25.5%) | 35406 (25.7%) |
| 2 teams | 25080 (16.5%) | 24920 (16.5%) | 24972 (16.5%) | 25398 (16.5%) | 22808 (16.5%) |
| 3 or more teams | 19398 (12.7%) | 19273 (12.8%) | 19345 (12.8%) | 19624 (12.8%) | 17440 (12.7%) |
| Q46 | Mean ± SD | 2.4 ± 2.1 | / | / | / | / |
| Q50 | Mean ± SD | / | 1.1 ± 0.7 | / | / | / |
| Q51 | Mean ± SD | / | / | 1.2 ± 0.7 | / | / |
| Q52 | Mean ± SD | / | / | / | 1.0 ± 0.4 | / |
| Q53 | Mean ± SD | / | / | / | 1.1 ± 0.6 | / |
| Q54 | Mean ± SD | / | / | / | / | 1.1 ± 0.6 |
| Q55 | Mean ± SD | / | / | 1.0 ± 0.2 | / | / |
| Ever marijuana use | Never used | 90919 (59.7%) | / | / | / | / |
| Ever used | 61274 (40.3%) | / | / | / | / |
| Ever cocaine use | Never used | / | 141674 (93.7%) | / | / | / |
| Ever used | / | 9468 (6.3%) | / | / | / |
| Ever inhalant use | Never used | / | / | 136265 (90.3%) | / | / |
| Ever used | / | / | 14687 (9.7%) | / | / |
| Illegal injected drug use | Never used | / | / | 148764 (98.6%) | / | / |
| Ever used | / | / | 2188 (1.4%) | / | / |
| Ever heroin use | Never used | / | / | / | 151014 (98.2%) | / |
| Ever used | / | / | / | 2819 (1.8%) | / |
| Ever methamphetamine use | Never used | / | / | / | 147490 (95.9%) | / |
| Ever used | / | / | / | 6343 (4.1%) | / |
| Ever ecstasy use | Never used | / | / | / | / | 129741 (94.1%) |
| Ever used | / | / | / | / | 8078 (5.9%) |

**Note: Data are presented as unweighted frequencies (n) and weighted percentages (%). Abbreviations: SD, Standard Deviation; BMI, Body Mass Index.**

**Table S5. Operational definitions and categorization of binary outcome variables**

| Name | Raw level | Combined levels |
| --- | --- | --- |
| Drinking-and-driving | I did not drive a car or other vehicle during the past 30 days | No driving or 0 times |
| 0 times |
| 1 time | Alcohol-impaired driving |
| 2 or 3 times |
| 4 or 5 times |
| 6 or more times |
| Texting-while-driving | I did not drive a car or other vehicle during the past 30 days | No driving or 0 times |
| 0 days |
| 1 or 2 days | Texting while driving |
| 3 to 5 days |
| 6 to 9 days |
| 10 to 19 days |
| All 30 days |
| 20 to 29 days |
| Cigarette use | 0 days | Never |
| 1 or 2 days | Ever |
| 3 to 5 days |
| 6 to 9 days |
| 10 to 19 days |
| 20 to 29 days |
| All 30 days |
| Electronic vapor use | 0 days | Never used |
| 1 or 2 days | Ever used |
| 3 to 5 days |
| 6 to 9 days |
| 10 to 19 days |
| 20 to 29 days |
| All 30 days |
| Alcohol use | 0 days | Never |
| 1 or 2 days | Ever |
| 3 to 5 days |
| 6 to 9 days |
| 10 to 19 days |
| 20 to 29 days |
| All 30 days |
| Marijuana use | 0 times | Never used |
| 1 or 2 times | Ever used |
| 1 or 2 times |
| 10 to 19 times |
| 20 to 39 times |
| 40 to 99 times |
| 100 or more times |
| Cocaine use | 0 times | Never used |
| 1 or 2 times | Ever used |
| 1 or 2 times |
| 10 to 19 times |
| 20 to 39 times |
| 40 or more times |
| Inhalant use | 0 times | Never used |
| 1 or 2 times | Ever used |
| 1 or 2 times |
| 10 to 19 times |
| 20 to 39 times |
| 40 or more times |
| Heroin use | 0 times | Never used |
| 1 or 2 times | Ever used |
| 1 or 2 times |
| 10 to 19 times |
| 20 to 39 times |
| 40 or more times |
| Methamphetamine use | 0 times | Never used |
| 1 or 2 times | Ever used |
| 1 or 2 times |
| 10 to 19 times |
| 20 to 39 times |
| 40 or more times |
| Ecstasy use | 0 times | Never used |
| 1 or 2 times | Ever used |
| 1 or 2 times |
| 10 to 19 times |
| 20 to 39 times |
| 40 or more times |
| Illegal injected drug use | 0 times | Never used |
| 1 time | Ever used |
| 2 or more times |
| Sexual activity (past 3 months) | I have never had sexual intercourse | No partnered sex |
| I have had sexual intercourse, but not during the past 3 months |
| 1 person | Had sex |
| 2 people |
| 3 people |
| 4 people |
| 5 people |
| 6 or more people |
| Condom use at last sexual intercourse | I have never had sexual intercourse | No condom use |
| No |
| Yes | Used condom |

**Note: This table details the dichotomization process. "Raw level" represents original survey responses, and "Combined levels" indicates how responses were grouped for binary logistic regression analysis.**

**Table S6. Adjusted predicted probabilities of risk behaviors by sports team participation frequency**

| Risk Behavior | | Never | One | Two | Three or more |
| --- | --- | --- | --- | --- | --- |
| Driving Behaviors | Drinking and driving | 2.2% (2.0%, 2.4%) | 2.8% (2.6%, 3.1%) | 3.2% (2.9%, 3.5%) | 3.4% (3.0%, 3.8%) |
| Texting while driving | 11.9% (11.5%, 12.3%) | 19.2% (18.5%, 19.9%) | 23.4% (22.5%, 24.3%) | 26.1% (24.9%, 27.2%) |
| Smoking and alcohol behaviour | Current cigarette use | 13.8% (13.5%, 14.1%) | 11.3% (11.0%, 11.6%) | 10.5% (10.1%, 10.8%) | 8.9% (8.6%, 9.3%) |
| Current electronic vapor use | 18.5% (18.0%, 19.1%) | 19.7% (19.0%, 20.4%) | 20.0% (19.2%, 20.9%) | 20.3% (19.2%, 21.4%) |
| Current alcohol use | 32.7% (32.3%, 33.1%) | 35.4% (34.8%, 35.9%) | 36.5% (35.8%, 37.2%) | 36.6% (35.8%, 37.3%) |
| Drug Use | Ever marijuana use | 40.6% (40.2%, 41.0%) | 39.5% (39.0%, 40.1%) | 39.6% (38.9%, 40.2%) | 37.4% (36.6%, 38.1%) |
| Ever cocaine use | 4.8% (4.6%, 5.0%) | 3.8% (3.6%, 4.0%) | 3.5% (3.3%, 3.8%) | 3.9% (3.6%, 4.1%) |
| Ever inhalant use | 9.4% (9.2%, 9.7%) | 8.1% (7.8%, 8.4%) | 8.1% (7.8%, 8.5%) | 8.1% (7.7%, 8.4%) |
| Illegal injected drug use | 1.3% (1.2%, 1.4%) | 1.2% (1.0%, 1.3%) | 1.4% (1.2%, 1.5%) | 2.0% (1.8%, 2.3%) |
| Ever heroin use | 1.7% (1.6%, 1.8%) | 1.4% (1.3%, 1.6%) | 1.6% (1.5%, 1.8%) | 2.3% (2.1%, 2.5%) |
| Ever methamphetamine use | 3.3% (3.2%, 3.5%) | 2.7% (2.5%, 2.8%) | 2.5% (2.3%, 2.7%) | 3.0% (2.7%, 3.2%) |
| Ever ecstasy use | 5.5% (5.3%, 5.7%) | 4.7% (4.5%, 4.9%) | 4.6% (4.3%, 4.8%) | 4.9% (4.6%, 5.3%) |
| Sexual Behaviors | Current sexual activity | 31.2% (30.8%, 31.6%) | 33.0% (32.5%, 33.5%) | 35.1% (34.4%, 35.7%) | 36.8% (36.1%, 37.6%) |
| Condom use | 25.2% (24.8%, 25.6%) | 29.6% (29.1%, 30.1%) | 32.3% (31.6%, 32.9%) | 32.4% (31.6%, 33.1%) |

**Note: Values represent the predicted probability (percentage) of engaging in each risk behavior derived from logistic regression models, adjusted for age, sex, race/ethnicity, and BMI. Bold values indicate the comparison groups highlighted in the results. Abbreviations: CI, Confidence Interval.**
